# Supplementary material for: Theoretical in-Solution Conformational/Tautomeric Analyses for Chain Systems with Conjugated Double Bonds Involving Nitrogen(s)
Source: PubMed Central journal article supplement (PMC4463675; doi:10.3390/ijms160510767), 2015-05-13
Supplement: ijms-16-10767-s001.pdf [file ijms-16-10767-s001.pdf]

## Supplementary Information

**Table S1.** Major optimized geometric parameters using the aug-cc-pvtz basis set. Data are rounded to the last decimal <sup>a</sup>. (Experimental values in parentheses).

| Structures in Schemes     | B97D <sup>b</sup> |                                 |       | MP2 <sup>c</sup> |                                 |       |
|---------------------------|-------------------|---------------------------------|-------|------------------|---------------------------------|-------|
|                           | Gas               | CH <sub>2</sub> Cl <sub>2</sub> | Water | Gas              | CH <sub>2</sub> Cl <sub>2</sub> | Water |
| CH <sub>2</sub> =CH-CH=NH |                   |                                 |       |                  |                                 |       |
| C=C (1)                   | 134.1             | 134.1                           | 134.1 | 133.9 (133.6)    | 133.9                           | 133.9 |
| (2)                       | 134.1             | 134.1                           | 134.1 | 133.9            | 133.9                           | 133.9 |
| (3)                       | 134.1             | 134.0                           | 134.0 | 133.9            | 133.8                           | 133.8 |
| (4)                       | 133.9             | 133.9                           | 133.9 |                  |                                 | 133.8 |
| C-C (1)                   | 146.1             | 145.8                           | 145.8 | 145.8 (145.4)    | 145.6                           | 145.6 |
| (2)                       | 146.6             | 146.2                           | 146.1 | 146.2            | 145.9                           | 145.8 |
| (3)                       | 147.7             | 147.5                           | 147.3 | 147.2            | 147.1                           | 147.1 |
| (4)                       | 148.1             | 147.8                           | 147.7 |                  |                                 | 147.0 |
| C=N (1)                   | 128.2             | 128.4                           | 128.5 | 128.4 (127.4)    | 128.5                           | 128.5 |
| (2)                       | 128.1             | 128.4                           | 128.5 | 128.3            | 128.5                           | 128.5 |
| (3)                       | 128.1             | 128.3                           | 128.3 | 128.3            | 128.3                           | 128.3 |
| (4)                       | 127.9             | 128.2                           | 128.3 |                  |                                 | 128.3 |
| N-H (1)                   | 102.3             | 102.1                           | 102.2 | 102.0 (101.4)    | 101.9                           | 101.9 |
| (2)                       | 102.8             | 102.6                           | 102.6 | 102.3            | 102.2                           | 102.3 |
| (3)                       | 102.2             | 102.1                           | 102.1 | 101.9            | 101.8                           | 101.8 |
| (4)                       | 102.8             | 102.6                           | 102.6 |                  |                                 | 102.3 |
| CCC (1)                   | 122.4             | 121.8                           | 121.6 | 121.9 (122.9)    | 121.3                           | 121.2 |
| (2)                       | 122.7             | 122.2                           | 122.0 | 122.1            | 121.4                           | 121.4 |
| (3)                       | 124.5             | 124.8                           | 124.7 | 123.1            | 123.6                           | 123.6 |
| (4)                       | 124.6             | 124.6                           | 124.6 |                  |                                 | 122.8 |
| CCN (1)                   | 121.4             | 122.0                           | 122.0 | 120.7 (121.5)    | 121.3                           | 121.4 |
| (2)                       | 127.4             | 126.8                           | 126.6 | 126.9            | 126.3                           | 126.1 |
| (3)                       | 123.0             | 123.5                           | 123.5 | 121.8            | 122.3                           | 122.4 |
| (4)                       | 128.5             | 128.3                           | 128.3 |                  |                                 | 126.5 |
| CNH (1)                   | 110.5             | 109.9                           | 109.8 | 110.1 (111.7)    | 109.6                           | 109.4 |
| (2)                       | 110.3             | 109.9                           | 109.8 | 109.7            | 109.4                           | 109.2 |
| (3)                       | 110.5             | 109.8                           | 109.7 | 109.9            | 109.3                           | 109.2 |
| (4)                       | 110.5             | 110.4                           | 110.4 |                  |                                 | 109.3 |
| CCCN (1)                  | 180.0             | 180.0                           | 180.0 | 180.0            | 180.0                           | 180.0 |
| (2)                       | 180.0             | 180.0                           | 180.0 | 180.0            | 180.0                           | 180.0 |
| (3)                       | 0.0               | 5.7                             | 13.1  | 0.0              | 0.2                             | 0.2   |
| (4)                       | 22.5              | 17.6                            | 15.9  |                  |                                 | 30.6  |
| CCNH (1)                  | 180.0             | 180.0                           | 180.0 | 180.0            | 180.0                           | 180.0 |
| (2)                       | 0.0               | 0.0                             | 0.0   | 0.0              | 0.0                             | 0.0   |
| (3)                       | 180.0             | 180.4                           | 180.6 | 180.0            | 180.0                           | 180.0 |
| (4)                       | 1.4               | 0.9                             | 0.8   |                  |                                 | 1.7   |
| <b>Dipole moments</b>     |                   |                                 |       |                  |                                 |       |
| (1)                       | 2.08              | 2.84                            | 3.02  | 2.13 (2.01)      | 2.82                            | 2.98  |
| (2)                       | 2.65              | 3.46                            | 3.63  | 2.67 (2.51)      | 3.39                            | 3.53  |
| (3)                       | 1.62              | 2.33                            | 2.43  | 1.70             | 2.30                            | 2.45  |
| (4)                       | 2.51              | 3.26                            | 3.41  |                  |                                 | 3.31  |

Table S1. *Cont.*

| Structures in Schemes            | B97D <sup>b</sup> |                                 |       | MP2 <sup>c</sup> |                                 |       |
|----------------------------------|-------------------|---------------------------------|-------|------------------|---------------------------------|-------|
|                                  | Gas               | CH <sub>2</sub> Cl <sub>2</sub> | Water | Gas              | CH <sub>2</sub> Cl <sub>2</sub> | Water |
| <b>TS (1 to 2, CCNH Torsion)</b> |                   |                                 |       |                  |                                 |       |
| C=C                              | 134.0             | 134.0                           | 134.0 | 133.9            |                                 |       |
| C–C                              | 148.1             | 147.9                           | 147.8 | 147.6            |                                 |       |
| C=N                              | 124.5             | 124.7                           | 124.8 | 124.5            |                                 |       |
| N–H                              | 99.0              | 99.2                            | 99.2  | 99.0             |                                 |       |
| CCC                              | 121.6             | 121.1                           | 121.1 | 120.9            |                                 |       |
| CCN                              | 125.6             | 125.7                           | 125.6 | 125.3            |                                 |       |
| CNH                              | 179.3             | 179.6                           | 179.7 | 179.2            |                                 |       |
| CCCN                             | 180.0             | 180.2                           | 180.2 | 180.0            |                                 |       |
| CCNH                             | 124.9             | 125.3                           | 125.4 | 125.4            |                                 |       |
| <b>Dipole Moments</b>            |                   |                                 |       |                  |                                 |       |
| TS(1 to 2)                       | 0.57              | 0.82                            | 0.89  | 0.54             |                                 |       |
| <b>TS (1 to 3, CCCN Torsion)</b> |                   |                                 |       |                  |                                 |       |
| C=C                              | 133.3             | 133.3                           | 133.3 | 133.4            |                                 |       |
| C–C                              | 149.1             | 148.9                           | 148.8 | 148.3            |                                 |       |
| C=N                              | 127.5             | 127.6                           | 127.7 | 127.9            |                                 |       |
| N–H                              | 102.5             | 102.3                           | 102.3 | 102.1            |                                 |       |
| CCC                              | 123.8             | 123.7                           | 123.6 | 122.8            |                                 |       |
| CCN                              | 121.6             | 121.9                           | 121.9 | 120.7            |                                 |       |
| CNH                              | 110.2             | 109.9                           | 109.9 | 109.7            |                                 |       |
| CCCN                             | 95.4              | 96.0                            | 96.3  | 96.1             |                                 |       |
| CCNH                             | 179.7             | 179.5                           | 179.5 | 179.9            |                                 |       |
| <b>Dipole Moments</b>            |                   |                                 |       |                  |                                 |       |
| TS (1 to 3)                      | 1.88              | 2.51                            | 2.67  | 1.96             |                                 |       |
| <b>O=CH–CH=NH</b>                |                   |                                 |       |                  |                                 |       |
| O=C(5)                           | 121.3             | 121.7                           | 121.7 | 121.7            | 121.9                           | 121.9 |
| (6)                              | 121.0             | 121.4                           | 121.5 |                  |                                 |       |
| (7)                              | 121.2             | 121.5                           | 121.5 | 121.6            | 121.8                           | 121.8 |
| (8)                              | 120.8             | 121.4                           | 121.5 | 121.2            | 121.6                           | 121.7 |
| (9)                              | 117.2             | 117.5 <sup>b</sup>              | 117.4 | 117.1            | 117.1                           | 117.1 |
| C–C(5)                           | 150.2             | 149.8                           | 149.7 | 149.0            | 148.7                           | 148.6 |
| (6)                              | 150.5             | 150.3                           | 150.2 |                  |                                 |       |
| (7)                              | 152.1             | 152.0                           | 152.0 | 150.6            | 150.5                           | 150.5 |
| (8)                              | 152.0             | 151.6                           | 151.5 | 150.6            | 150.2                           | 150.1 |
| (9)                              | 132.4             | 132.2 <sup>b</sup>              | 132.1 | 132.6            | 132.4                           | 132.3 |
| C–N(5)                           | 127.6             | 127.6                           | 127.6 | 127.9            | 127.9                           | 127.9 |
| (6)                              | 127.6             | 127.6                           | 127.6 |                  |                                 |       |
| (7)                              | 127.3             | 127.3                           | 127.3 | 127.6            | 127.7                           | 127.7 |
| (8)                              | 127.3             | 127.4                           | 127.4 | 127.7            | 127.7                           | 127.7 |
| (9)                              | 144.6             | 145.0 <sup>b</sup>              | 144.8 | 143.4            | 143.7                           | 143.8 |
| N–H (5)                          | 102.5             | 102.3                           | 102.3 | 102.1            | 102.0                           | 102.0 |
| (6)                              | 103.1             | 102.9                           | 102.8 |                  |                                 |       |
| (7)                              | 103.1             | 102.9                           | 102.9 | 102.8            | 102.6                           | 102.6 |

Table S1. *Cont.*

| Structures in Schemes            | B97D <sup>b</sup> |                                 |       | MP2 <sup>c</sup> |                                 |       |
|----------------------------------|-------------------|---------------------------------|-------|------------------|---------------------------------|-------|
|                                  | Gas               | CH <sub>2</sub> Cl <sub>2</sub> | Water | Gas              | CH <sub>2</sub> Cl <sub>2</sub> | Water |
| (8)                              | 102.5             | 102.3                           | 102.3 | 102.1            | 102.0                           | 101.9 |
| (9)                              | 101.5             | 101.6 <sup>b</sup>              | 101.5 | 101.0            |                                 |       |
| OCC (5)                          | 122.7             | 122.9                           | 122.9 | 122.5            | 122.6                           | 122.7 |
| (6)                              | 124.2             | 123.6                           | 123.5 |                  |                                 |       |
| (7)                              | 122.9             | 122.5                           | 122.4 | 121.8            | 121.4                           | 121.3 |
| (8)                              | 125.1             | 124.5                           | 124.4 | 124.0            | 123.4                           | 123.3 |
| (9)                              | 177.3             | 177.4 <sup>b</sup>              | 178.0 | 178.8            | 179.0                           | 179.0 |
| CCN (5)                          | 118.4             | 118.0                           | 117.9 | 117.6            | 117.2                           | 117.2 |
| (6)                              | 123.8             | 123.2                           | 123.1 |                  |                                 |       |
| (7)                              | 124.5             | 124.0                           | 123.9 | 122.9            | 122.4                           | 122.2 |
| (8)                              | 121.2             | 120.9                           | 120.8 | 120.1            | 119.8                           | 119.8 |
| (9)                              | 120.1             | 120.1 <sup>b</sup>              | 120.5 | 121.8            | 121.8                           | 121.7 |
| CNH (5)                          | 111.2             | 110.9                           | 110.8 | 110.8            | 110.5                           | 110.4 |
| (6)                              | 110.5             | 110.5                           | 110.5 |                  |                                 |       |
| (7)                              | 109.4             | 109.6                           | 109.6 | 107.9            | 107.9                           | 107.9 |
| (8)                              | 110.7             | 110.2                           | 110.2 | 110.0            | 109.6                           | 109.5 |
| (9)                              | 112.8             | 111.9 <sup>b</sup>              | 111.6 | 112.9            |                                 |       |
| OCCN (5)                         | 180.0             | 179.8                           | 179.8 | 180.0            | 179.9                           | 179.9 |
| (6)                              | 180.0             | 180.0                           | 180.0 |                  |                                 |       |
| (7)                              | 0.0               | 0.0                             | 0.0   | 0.0              | 0.0                             | 0.0   |
| (8)                              | 0.4               | 6.2                             | 6.6   | 0.4              | 11.1                            | 10.4  |
| (9)                              | 117.4             | 117.6 <sup>b</sup>              | 118.5 | 120.6            | 120.9                           | 120.8 |
| CCNH (5)                         | 180.0             | 180.0                           | 180.0 | 180.0            | 180.0                           | 180.0 |
| (6)                              | 0.0               | 0.0                             | 0.0   |                  |                                 |       |
| (7)                              | 0.0               | 0.0                             | 0.0   | 0.0              | 0.0                             | 0.0   |
| (8)                              | 180.0             | 179.7                           | 179.3 | 180.0            | 179.5                           | 179.5 |
| (9)                              | 61.9              | 60.8                            | 64.5  | 62.4             | 64.2                            | 64.6  |
|                                  | -61.9             | -60.3                           | -55.9 | -62.2            | -57.2                           | -55.8 |
| <b>Dipole Moments</b>            |                   |                                 |       |                  |                                 |       |
| (5)                              | 2.28              | 2.84                            | 2.95  | 2.25             | 2.76                            | 2.86  |
| (6)                              | 1.40              | 1.87                            | 1.97  |                  |                                 |       |
| (7)                              | 2.03              | 2.69                            | 2.84  | 2.34             | 3.03                            | 3.17  |
| (8)                              | 3.88              | 5.02                            | 5.28  | 4.07             | 5.18                            | 5.44  |
| (9)                              | 0.96              | 1.13                            | 1.16  | 0.74             | 0.86                            | 0.88  |
| <b>TS (6 to 7, CCCN Torsion)</b> |                   |                                 |       |                  |                                 |       |
| O=C                              | 121.1             | 121.5                           | 121.5 | 121.6            |                                 |       |
| C-C                              | 151.9             | 151.5                           | 151.4 | 150.2            |                                 |       |
| C=N                              | 127.3             | 127.4                           | 127.4 | 127.8            |                                 |       |
| N-H                              | 102.8             | 102.7                           | 102.6 | 102.4            |                                 |       |
| OCC                              | 122.9             | 122.4                           | 122.2 | 122.5            |                                 |       |
| CCN                              | 124.3             | 123.9                           | 123.9 | 124.1            |                                 |       |
| CNH                              | 111.5             | 111.6                           | 111.6 | 110.5            |                                 |       |
| OCCN                             | 87.3              | 88.2                            | 88.4  | 89.2             |                                 |       |
| CCNH                             | 0.2               | 0.5                             | 0.5   | 0.2              |                                 |       |

Table S1. *Cont.*

| Structures in Schemes | B97D <sup>b</sup>  |                                 |                    | MP2 <sup>c</sup> |                                 |       |
|-----------------------|--------------------|---------------------------------|--------------------|------------------|---------------------------------|-------|
|                       | Gas                | CH <sub>2</sub> Cl <sub>2</sub> | Water              | Gas              | CH <sub>2</sub> Cl <sub>2</sub> | Water |
| <b>Dipole Moments</b> |                    |                                 |                    |                  |                                 |       |
| TS (6 to 7)           | 1.92               | 2.49                            | 2.61               | 2.05             |                                 |       |
| HN=CH-CH=NH           |                    |                                 |                    |                  |                                 |       |
| H-N (10)              | 102.4              | 102.3                           | 102.2              | 102.0            | 102.0                           | 101.9 |
| (11)                  | 102.4              | 102.3                           | 102.2              | 102.0            | 102.0                           | 101.9 |
| (12)                  | 102.8              | 102.8 <sup>b</sup>              | 102.8 <sup>b</sup> | 102.4            | 102.3                           | 102.3 |
| (13)                  | 102.2              | 102.2 <sup>b</sup>              | 102.2 <sup>b</sup> | 101.9            | 101.8                           | 101.8 |
| (14)                  | 103.0 <sup>b</sup> | 102.8                           | 102.8              |                  | 102.5                           | 102.4 |
| (15)                  | 102.4 <sup>b</sup> | 102.3                           | 102.2              |                  | 102.0                           | 102.0 |
| (16)                  | 102.6 <sup>b</sup> | 102.7 <sup>b</sup>              | 102.5              | 102.1            |                                 |       |
| N=C (10)              | 127.9              | 127.9                           | 127.9              | 128.1            | 128.1                           | 128.1 |
| (11)                  | 127.7              | 127.8                           | 127.8              | 128.0            | 128.0                           | 128.0 |
| (12)                  | 127.7              | 127.8 <sup>b</sup>              | 127.6 <sup>b</sup> | 128.0            | 128.0                           | 128.0 |
| (13)                  | 127.6              | 127.6 <sup>b</sup>              | 127.6 <sup>b</sup> | 127.9            | 127.9                           | 127.9 |
| (14)                  | 127.5 <sup>b</sup> | 127.6                           | 127.6              |                  | 127.9                           | 127.9 |
| (15)                  | 127.5 <sup>b</sup> | 127.7                           | 127.7              |                  | 127.9                           | 128.0 |
| (16)                  | 123.7 <sup>b</sup> | 124.0 <sup>b</sup>              | 123.9              | 123.9            |                                 |       |
| C-C (10)              | 147.8              | 147.6                           | 147.6              | 147.0            | 147.0                           | 146.9 |
| (11)                  | 148.2              | 148.1                           | 148.1              | 147.4            | 147.3                           | 147.3 |
| (12)                  | 148.6              | 148.6 <sup>b</sup>              | 148.6 <sup>b</sup> | 147.7            | 147.7                           | 147.6 |
| (13)                  | 150.1              | 150.2 <sup>b</sup>              | 150.2 <sup>b</sup> | 149.1            | 149.1                           | 149.0 |
| (14)                  | 150.6 <sup>b</sup> | 150.3                           | 150.4              |                  | 149.1                           | 149.0 |
| (15)                  | 149.4 <sup>b</sup> | 149.3                           | 149.3              |                  | 148.3                           | 148.3 |
| (16)                  | 132.1 <sup>b</sup> | 132.0 <sup>b</sup>              | 131.9              | 131.9            |                                 |       |
| C-N (10)              | 127.9              | 127.9                           | 127.9              | 128.1            | 128.1                           | 128.1 |
| (11)                  | 127.8              | 127.9                           | 127.9              | 128.1            | 128.1                           | 128.1 |
| (12)                  | 127.7              | 127.8 <sup>b</sup>              | 127.8 <sup>b</sup> | 128.0            | 128.0                           | 128.0 |
| (13)                  | 127.4              | 127.7 <sup>b</sup>              | 127.7 <sup>b</sup> | 127.8            | 127.9                           | 127.9 |
| (14)                  | 127.5 <sup>b</sup> | 127.6                           | 127.6              |                  | 127.9                           | 127.9 |
| (15)                  | 127.5 <sup>b</sup> | 127.7                           | 127.7              |                  | 127.9                           | 128.0 |
| (16)                  | 142.9 <sup>b</sup> | 142.9 <sup>b</sup>              | 142.7              | 142.6            |                                 |       |
| N-H (10)              | 102.4              | 102.3                           | 102.2              | 102.0            | 102.0                           | 101.9 |
| (11)                  | 102.9              | 102.7                           | 102.7              | 102.4            | 102.3                           | 102.3 |
| (12)                  | 102.8              | 102.8 <sup>b</sup>              | 102.8 <sup>b</sup> | 102.4            | 102.3                           | 102.3 |
| (13)                  | 102.9              | 102.9 <sup>b</sup>              | 102.9 <sup>b</sup> | 102.7            | 102.7                           | 102.6 |
| (14)                  | 103.0 <sup>b</sup> | 102.8                           | 102.8              |                  | 102.5                           | 102.4 |
| (15)                  | 102.4 <sup>b</sup> | 102.3                           | 102.2              |                  | 102.2                           | 102.2 |
| (16)                  | 101.5 <sup>b</sup> | 101.5 <sup>b</sup>              | 101.4              | 101.2            |                                 |       |
| (16)                  | 101.7 <sup>b</sup> | 101.7 <sup>b</sup>              | 101.6              | 101.3            |                                 |       |
| HNC (10)              | 110.7              | 110.4                           | 110.3              | 110.3            | 110.0                           | 110.0 |
| (11)                  | 110.0              | 110.5                           | 110.4              | 110.5            | 110.1                           | 110.0 |
| (12)                  | 110.5              | 110.5 <sup>b</sup>              | 110.5 <sup>b</sup> | 109.9            | 109.7                           | 109.7 |
| (13)                  | 111.2              | 110.8 <sup>b</sup>              | 110.7 <sup>b</sup> | 110.8            | 110.2                           | 110.1 |
| (14)                  | 111.3 <sup>b</sup> | 111.3                           | 111.5              |                  | 110.3                           | 110.3 |

Table S1. *Cont.*

| Structures in Schemes | B97D <sup>b</sup>  |                                 |                    | MP2 <sup>c</sup> |                                 |       |
|-----------------------|--------------------|---------------------------------|--------------------|------------------|---------------------------------|-------|
|                       | Gas                | CH <sub>2</sub> Cl <sub>2</sub> | Water              | Gas              | CH <sub>2</sub> Cl <sub>2</sub> | Water |
| (15)                  | 110.2 <sup>b</sup> | 109.8                           | 109.7              |                  | 109.3                           | 109.2 |
| (16)                  | 114.5 <sup>b</sup> | 114.2 <sup>b</sup>              | 114.0              | 113.7            |                                 |       |
| NCC (10)              | 119.6              | 119.9                           | 119.9              | 119.0            | 119.3                           | 119.3 |
| (11)                  | 120.5              | 120.2                           | 120.2              | 119.5            | 119.3                           | 119.3 |
| (12)                  | 126.2              | 125.5 <sup>b</sup>              | 125.4 <sup>b</sup> | 125.6            | 124.9                           | 124.7 |
| (13)                  | 120.8              | 120.9 <sup>b</sup>              | 120.9 <sup>b</sup> | 119.3            | 119.2                           | 119.1 |
| (14)                  | 127.6 <sup>b</sup> | 126.9                           | 127.1              |                  | 125.8                           | 125.7 |
| (15)                  | 122.6 <sup>b</sup> | 122.7                           | 122.7              |                  | 121.2                           | 121.2 |
| (16)                  | 168.5 <sup>b</sup> | 169.1 <sup>b</sup>              | 169.7              | 170.0            |                                 |       |
| CCN (10)              | 119.6              | 119.9                           | 119.9              | 119.0            | 119.3                           | 119.3 |
| (11)                  | 125.4              | 125.1                           | 125.1              | 125.1            | 124.7                           | 124.7 |
| (12)                  | 126.2              | 125.5 <sup>b</sup>              | 125.4 <sup>b</sup> | 125.6            | 124.9                           | 124.7 |
| (13)                  | 126.4              | 126.2 <sup>b</sup>              | 126.2 <sup>b</sup> | 124.4            | 123.9                           | 123.7 |
| (14)                  | 127.6 <sup>b</sup> | 126.9                           | 127.1              |                  | 125.8                           | 125.7 |
| (15)                  | 122.6 <sup>b</sup> | 122.7                           | 122.7              |                  | 121.2                           | 121.2 |
| (16)                  | 125.4 <sup>b</sup> | 125.9 <sup>b</sup>              | 126.0              | 124.6            |                                 |       |
| CNH (10)              | 110.7              | 110.4                           | 110.3              | 110.3            | 110.0                           | 110.0 |
| (11)                  | 110.5              | 110.3                           | 110.3              | 109.8            | 109.7                           | 109.6 |
| (12)                  | 110.5              | 110.5 <sup>b</sup>              | 110.5 <sup>b</sup> | 109.8            | 109.7                           | 109.7 |
| (13)                  | 109.5              | 109.6 <sup>b</sup>              | 109.7 <sup>b</sup> | 107.8            | 107.6                           | 107.5 |
| (14)                  | 111.3 <sup>b</sup> | 111.3                           | 111.5              |                  | 110.3                           | 110.3 |
| (15)                  | 110.2 <sup>b</sup> | 109.8                           | 109.7              |                  | 109.3                           | 109.2 |
| (16)                  | 112.0 <sup>b</sup> | 112.1 <sup>b</sup>              | 112.0              | 111.4            |                                 |       |
| (16)                  | 111.9 <sup>b</sup> | 111.1 <sup>b</sup>              | 111.0              | 111.6            |                                 |       |
| HNCC (10)             | 180.0              | 180.0                           | 180.0              | 180.0            | 179.9                           | 180.0 |
| (11)                  | 180.0              | 180.0                           | 180.0              | 180.0            | 180.0                           | 180.0 |
| (12)                  | 0.0                | 0.0 <sup>b</sup>                | 0.0 <sup>b</sup>   | 0.0              | 0.0                             | 0.0   |
| (13)                  | 180.0              | 180.0 <sup>b</sup>              | 180.0 <sup>b</sup> | 180.1            | 180.1                           | 180.1 |
| (14)                  | 0.5 <sup>b</sup>   | 0.6                             | 0.5                |                  | 0.7                             | 0.7   |
| (15)                  | 179.8 <sup>b</sup> | 179.8                           | 179.8              |                  | 180.0                           | 180.0 |
| (16)                  | 126.1 <sup>b</sup> | 125.1 <sup>b</sup>              | 124.3              | 123.7            |                                 |       |
| NCCN (10)             | 180.0              | 180.0                           | 180.0              | 180.0            | 180.0                           | 180.0 |
| (11)                  | 180.0              | 180.0                           | 180.0              | 180.0            | 180.0                           | 180.0 |
| (12)                  | 180.0              | 179.9 <sup>b</sup>              | 179.9 <sup>b</sup> | 180.0            | 180.0                           | 180.1 |
| (13)                  | 0.0                | 0.2 <sup>b</sup>                | 0.2 <sup>b</sup>   | 0.1              | 0.1                             | 0.1   |
| (14)                  | 14.0 <sup>b</sup>  | 17.6                            | 14.9               |                  | 21.4                            | 22.2  |
| (15)                  | 26.8 <sup>b</sup>  | 22.7                            | 18.8               |                  | 29.8                            | 27.7  |
| (16)                  | 123.1 <sup>b</sup> | 124.1 <sup>b</sup>              | 124.9              | 122.7            |                                 |       |
| CCNH (10)             | 180.0              | 180.0                           | 180.0              | 180.0            | 180.1                           | 180.0 |
| (11)                  | 0.0                | 0.0                             | 0.0                | 0.0              | 0.0                             | 0.0   |
| (12)                  | 0.0                | 0.0 <sup>b</sup>                | 0.0 <sup>b</sup>   | 0.0              | 0.0                             | 0.0   |
| (13)                  | 0.0                | 0.0 <sup>b</sup>                | 0.0 <sup>b</sup>   | 0.0              | 0.0                             | 0.0   |
| (14)                  | 0.5 <sup>b</sup>   | 0.6                             | 0.5                |                  | 0.7                             | 0.7   |
| (15)                  | 179.8 <sup>b</sup> | 179.8                           | 179.8              |                  | 180.0                           | 180.0 |

Table S1. *Cont.*

| Structures in Schemes              | B97D <sup>b</sup>  |                                 |                    | MP2 <sup>c</sup> |                                 |       |
|------------------------------------|--------------------|---------------------------------|--------------------|------------------|---------------------------------|-------|
|                                    | Gas                | CH <sub>2</sub> Cl <sub>2</sub> | Water              | Gas              | CH <sub>2</sub> Cl <sub>2</sub> | Water |
| (16)                               | 1.7 <sup>b</sup>   | 7.0 <sup>b</sup>                | 7.3                | -7.0             |                                 |       |
| (16)                               | 120.4 <sup>b</sup> | 127.9 <sup>b</sup>              | 127.9 <sup>b</sup> | 114.0            |                                 |       |
| <b>Diamino Acetylene (17)</b>      |                    |                                 |                    |                  |                                 |       |
| H-N                                | 101.3              | 101.4 <sup>b</sup>              | 101.3              |                  |                                 |       |
| N-C                                | 135.1              | 135.4 <sup>b</sup>              | 135.3              |                  |                                 |       |
| C≡C                                | 121.5              | 121.8 <sup>b</sup>              | 121.7              |                  |                                 |       |
| HNC(ave)                           | 116.6              | 116.0 <sup>b</sup>              | 116.1 <sup>b</sup> |                  |                                 |       |
| H <sub>1</sub> NNH <sub>3</sub>    | 130.8              | 133.6 <sup>b</sup>              | 132.8              |                  |                                 |       |
| H <sub>1</sub> NNH <sub>4</sub>    | -90.8              | -90.6 <sup>b</sup>              | -90.4              |                  |                                 |       |
| H <sub>2</sub> NNH <sub>3</sub>    | -90.8              | -90.6 <sup>b</sup>              | -90.1              |                  |                                 |       |
| H <sub>2</sub> NNH <sub>4</sub>    | 47.7               | 45.2 <sup>b</sup>               | 44.7               |                  |                                 |       |
| <b>Dipole Moments</b>              |                    |                                 |                    |                  |                                 |       |
| (10)                               | 0.0                | 0.0                             | 0.0                | 0.0              | 0.0                             | 0.0   |
| (11)                               | 2.68               | 3.41                            | 3.58               | 2.83             | 3.56                            | 3.72  |
| (12)                               | 0.0                | 0.0                             | 0.0                | 0.0              | 0.0                             | 0.0   |
| (13)                               | 3.11               | 4.03                            | 4.22               | 3.42             | 4.36                            | 4.88  |
| (14)                               | 0.67               | 0.90                            | 0.91               |                  | 1.09                            | 1.14  |
| (15)                               | 3.31               | 4.46                            | 4.76               |                  | 4.60                            | 4.89  |
| (16)                               | 2.37               | 3.17                            | 3.35               | 2.38             |                                 |       |
| (17)                               | 1.19               | 1.62                            | 1.68               |                  |                                 |       |
| <b>TS (11 to 13, CCCN Torsion)</b> |                    |                                 |                    |                  |                                 |       |
| H-N                                | 102.4              | 102.3                           | 102.3              | 102.1            |                                 |       |
| N=C                                | 27.3               | 127.4                           | 127.4              | 127.8            |                                 |       |
| C-C                                | 150.4              | 150.1                           | 150.1              | 149.1            |                                 |       |
| C=N                                | 127.3              | 127.5                           | 127.5              | 127.8            |                                 |       |
| N-H                                | 102.8              | 102.6                           | 102.6              | 102.3            |                                 |       |
| HNC                                | 110.7              | 110.2                           | 110.1              | 110.1            |                                 |       |
| NCC                                | 120.7              | 120.8                           | 120.7              | 119.7            |                                 |       |
| CCN                                | 125.3              | 125.1                           | 125.0              | 124.8            |                                 |       |
| CNH                                | 110.9              | 110.8                           | 110.8              | 109.9            |                                 |       |
| HNCC                               | -178.2             | -178.5                          | -178.5             | -178.5           |                                 |       |
| NCCN                               | 92.7               | 93.2                            | 93.4               | 93.6             |                                 |       |
| CCNH                               | -1.1               | -0.7                            | -0.5               | -0.6             |                                 |       |
| <b>Dipole Moments</b>              |                    |                                 |                    |                  |                                 |       |
| TS (12 to 13)                      | 2.90               | 3.70                            | 3.89               | 3.11             |                                 |       |
| <b>TS (10 to 15, CCCN Torsion)</b> |                    |                                 |                    |                  |                                 |       |
| H-N                                | 102.4              | 102.4                           | 102.1              |                  |                                 |       |
| N=C                                | 127.2              | 127.4                           | 127.7              |                  |                                 |       |
| C-C                                | 150.2              | 150.2                           | 148.9              |                  |                                 |       |
| C=N                                | 127.2              | 127.4                           | 127.7              |                  |                                 |       |
| N-H                                | 102.4              | 102.4                           | 102.1              |                  |                                 |       |
| HNC                                | 110.5              | 110.2                           | 110.0              |                  |                                 |       |
| NCC                                | 120.8              | 120.6                           | 119.8              |                  |                                 |       |

Table S1. *Cont.*

| Structures in Schemes              | B97D <sup>b</sup> |                                 |       | MP2 <sup>c</sup> |                                 |       |
|------------------------------------|-------------------|---------------------------------|-------|------------------|---------------------------------|-------|
|                                    | Gas               | CH <sub>2</sub> Cl <sub>2</sub> | Water | Gas              | CH <sub>2</sub> Cl <sub>2</sub> | Water |
| CCN                                | 120.8             | 120.6                           | 119.8 |                  |                                 |       |
| CNH                                | 110.5             | 110.2                           | 110.0 |                  |                                 |       |
| HNCC                               | 179.6             | 179.7                           | 180.0 |                  |                                 |       |
| NCCN                               | 86.3              | 93.5                            | 83.6  |                  |                                 |       |
| CCNH                               | 179.6             | 179.7                           | 180.0 |                  |                                 |       |
| <b>TS (10 to 15, CCCN Torsion)</b> |                   |                                 |       |                  |                                 |       |
| H–N                                | 102.4             | 102.4                           | 102.1 |                  |                                 |       |
| N=C                                | 127.2             | 127.4                           | 127.7 |                  |                                 |       |
| C–C                                | 150.2             | 150.2                           | 148.9 |                  |                                 |       |
| C=N                                | 127.2             | 127.4                           | 127.7 |                  |                                 |       |
| N–H                                | 102.4             | 102.4                           | 102.1 |                  |                                 |       |
| HNC                                | 110.5             | 110.2                           | 110.0 |                  |                                 |       |
| NCC                                | 120.8             | 120.6                           | 119.8 |                  |                                 |       |
| CCN                                | 120.8             | 120.6                           | 119.8 |                  |                                 |       |
| CNH                                | 110.5             | 110.2                           | 110.0 |                  |                                 |       |
| HNCC                               | 179.6             | 179.7                           | 180.0 |                  |                                 |       |
| NCCN                               | 86.3              | 93.5                            | 83.6  |                  |                                 |       |
| CCNH                               | 179.6             | 179.7                           | 180.0 |                  |                                 |       |
| <b>Dipole Moments</b>              |                   |                                 |       |                  |                                 |       |
| TS (10 to 15)                      | 2.67              | 3.48                            | 2.84  |                  |                                 |       |

<sup>a</sup> Distances in pm, angles in deg; <sup>b</sup> Where superscript “b” was indicated for B97D parameters, the values were obtained through Berny optimization (numerical second derivative method). All positive frequencies were achieved where were calculated. B97D parameters without superscript were obtained from optimizations using analytical second derivatives. Application of this latter method was needed in order to obtain all positive frequencies; <sup>c</sup> All MP2 optimizations with the Berny method.

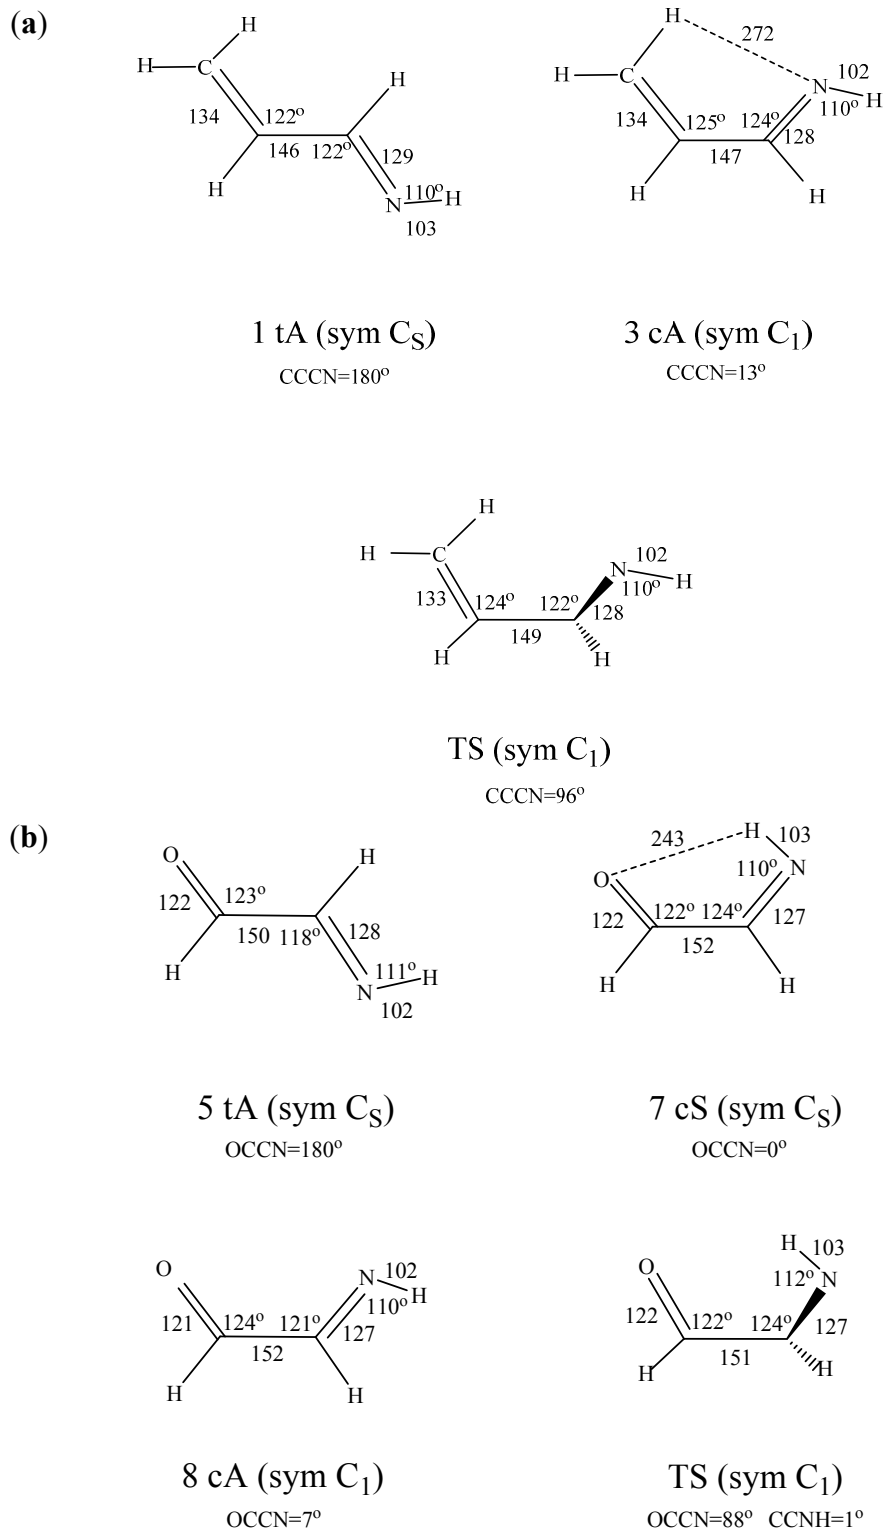

Figure S1. Cont.



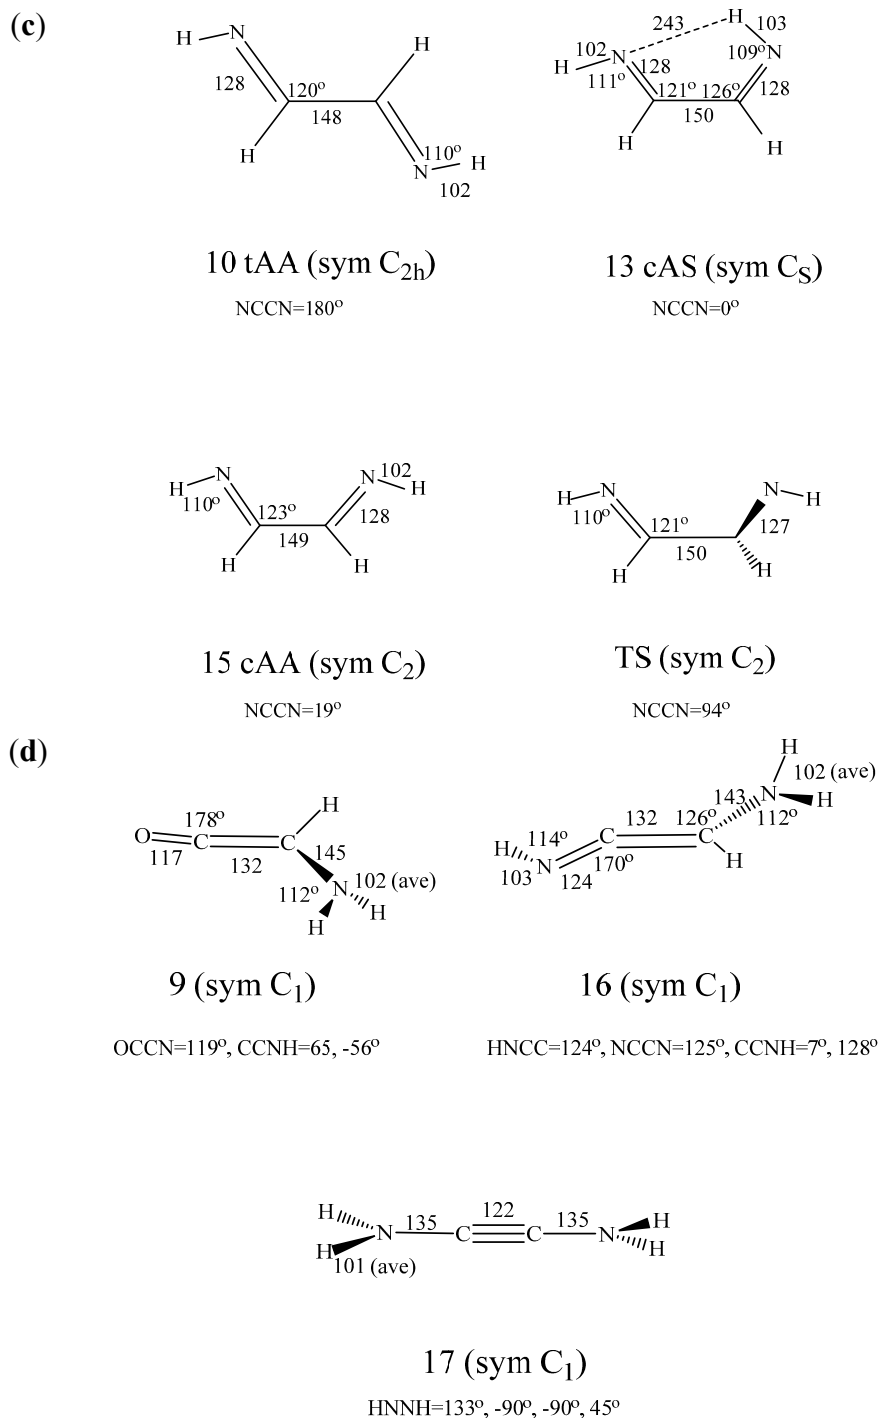

**Figure S1.** (a–d) Structure numbers from Schemes. IEP-PCM/B97D/aug-cc-pvtz optimized structural parameters in aqueous solution for species primarily discussed in the paper. Values appear at three digits. Four-digit internal coordinates are provided in the Table S1 for all optimized structures in different environments as calculated at the B97D and MP2 levels. The distances are provided in pm (although pm specification is not indicated because of the crowded drawings). Bond angle values are followed by the degree symbol. HNCC torsion angles are 180° or 0°, otherwise shown.
